# Supplementary material
Source: PubMed Central journal article supplement (PMC6645245)
Supplement: ao8b01856_si_001.pdf [file ao8b01856_si_001.pdf]

# **SUPPLEMENTARY MATERIAL**

## **Effectiveness of phyto-active molecules on transcriptional expression, biofilm matrix and cell wall components of *Candida glabrata* and its clinical isolates**

**Payal Gupta<sup>1</sup>, Sonam Gupta<sup>1</sup>, Meenakshi Sharma<sup>1</sup>, Navin Kumar<sup>2</sup>, Vikas Pruthi<sup>1\*</sup>, Krishna Mohan Poluri<sup>1\*</sup>**

<sup>1</sup>Department of Biotechnology, Indian Institute of Technology Roorkee,

Roorkee - 247667, Uttarakhand, India

<sup>2</sup>Department of Biotechnology, Graphic Era University, Dehradun - 248002, Uttarakhand, India

### **Corresponding Authors:**

#### **Prof. VikasPruthi**

Email: [vikasfbs@iitr.ac.in](mailto:vikasfbs@iitr.ac.in); [vikasfbs@gmail.com](mailto:vikasfbs@gmail.com)

PH.: 091-1332-285530

Fax: 091-1332-273560

#### **Dr. Krishna Mohan Poluri**

Email: [mohanpmk@gmail.com](mailto:mohanpmk@gmail.com); [krishfbt@iitr.ac.in](mailto:krishfbt@iitr.ac.in)

PH.: 091-1332-284779

Fax: 091-1332-273560

**Figure S1:** Effect of CIN and EUG on (A) *C. glabrata*, (B) CCG1, (C) CCG2, (D) CCG3 and (E) CCG4 biofilm development. The metabolic activity was measured by XTT reduction assay. Data is expressed in terms of percent inhibition of biofilm relative to its untreated control biofilm.

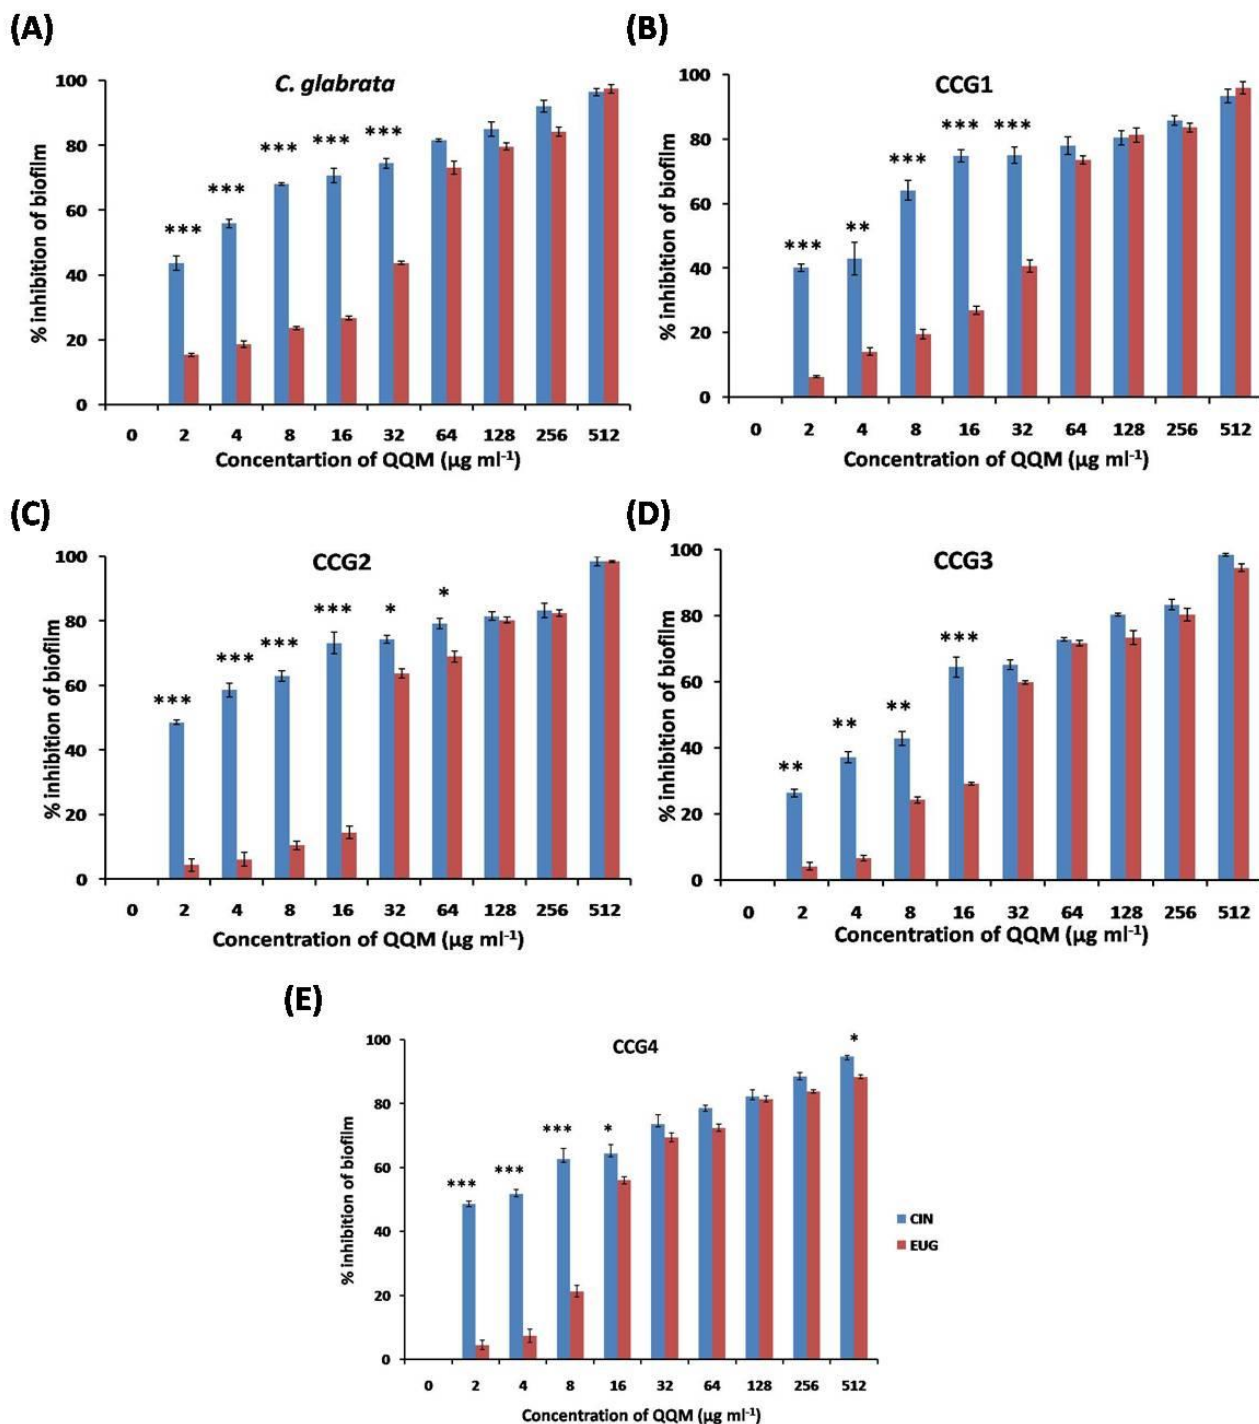

**Figure S2:** Effect of CIN and EUG in eradicating mature biofilm of (A) *C. glabrata*, (B) CCG1, (C) CCG2, (D) CCG3 and (E) CCG4. The metabolic activity was measured by XTT reduction assay. Data is expressed in terms of percent reduction of biofilm relative to its untreated control biofilm.

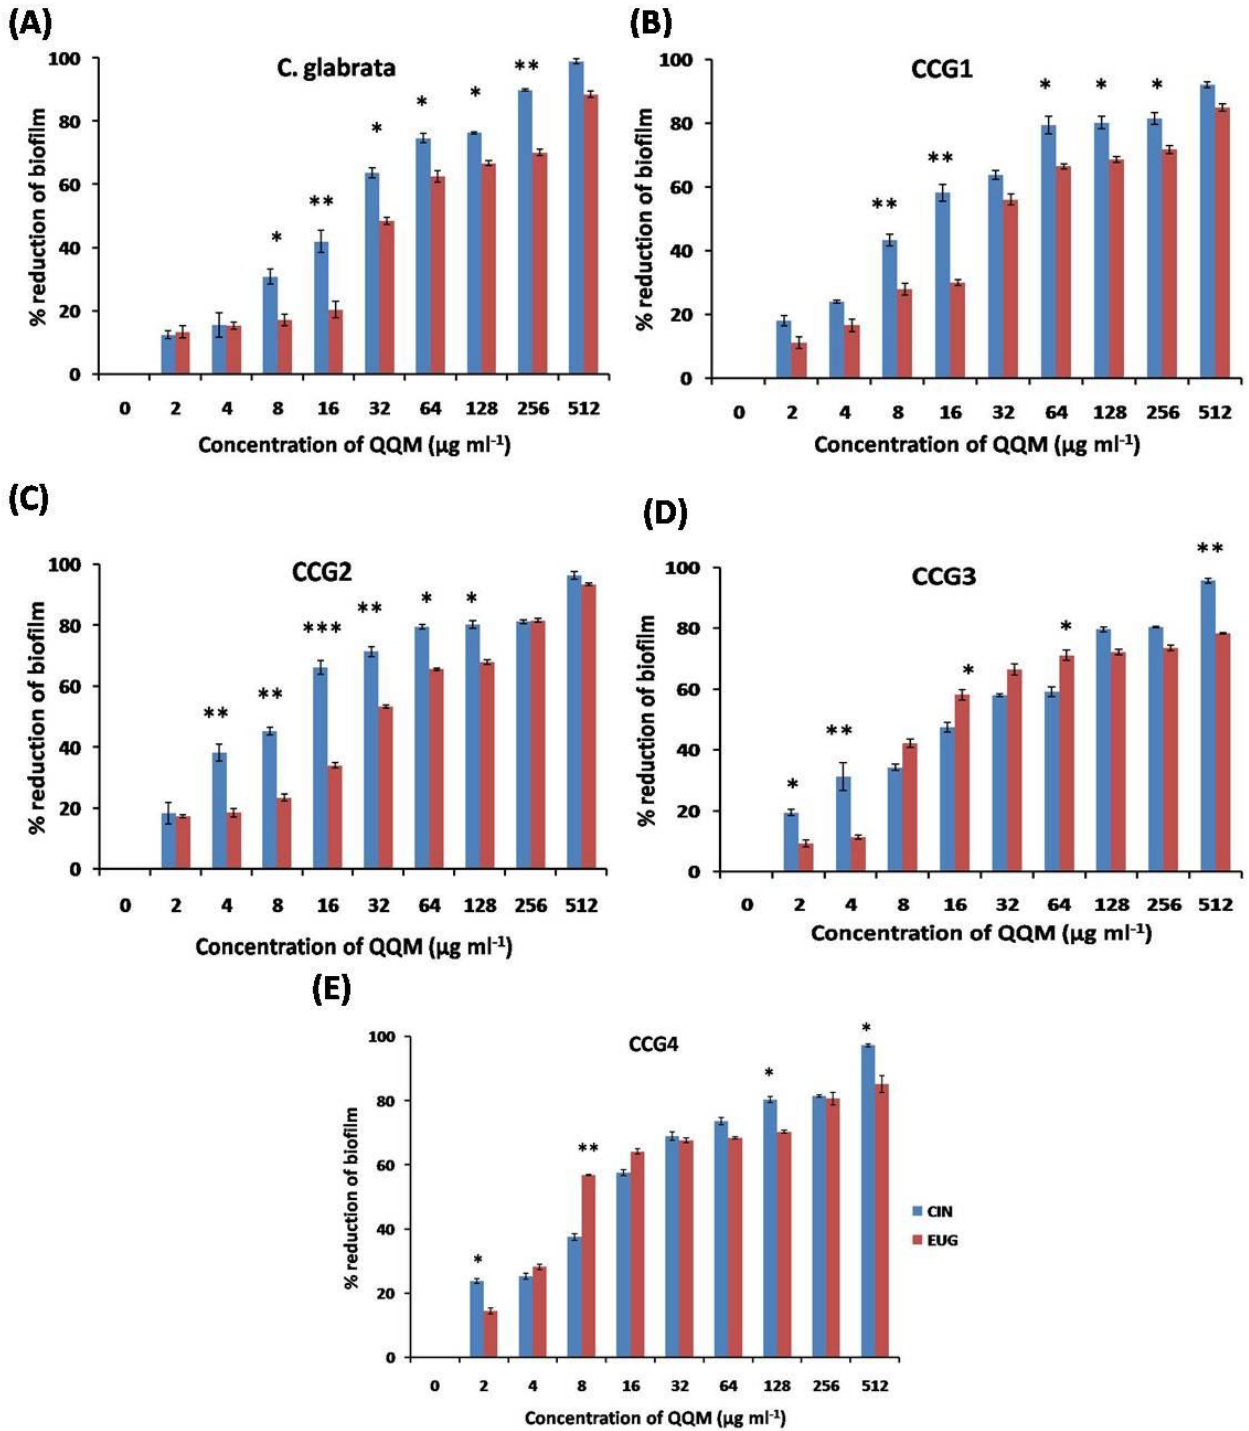

**Figure S3:** Quantification of hydrophobicity of *C. glabrata* and CCG3 cells treated with sub-inhibitory concentration of CIN ( $64 \mu\text{g ml}^{-1}$ ), and EUG ( $128 \mu\text{g ml}^{-1}$ ).

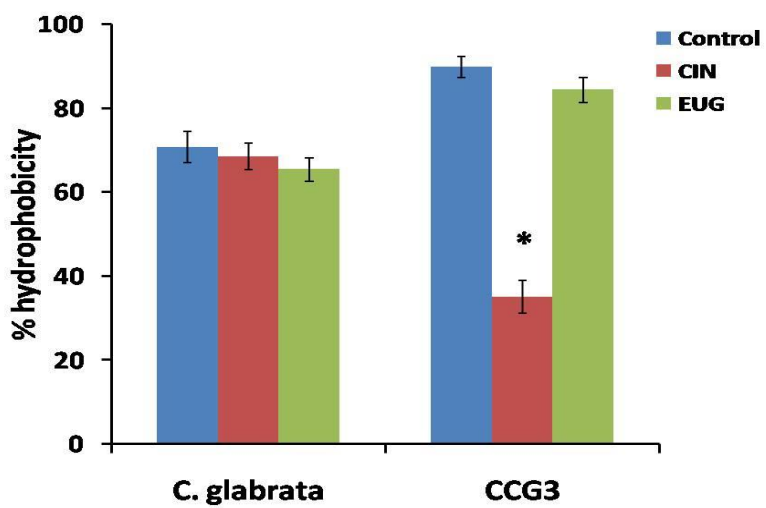

**Table S1:** Sequence of primers for RT-PCR

| Primer                  | Sequence (5'-3')                                    | Amplified product size (bp) |
|-------------------------|-----------------------------------------------------|-----------------------------|
| CgACT1-S<br>CgACT1-AS   | TTACCAACTGGGATGACATGGA<br>GGAGCCTCGGTCAACAAGAC      | 145                         |
| CgCDR1-S<br>CgCDR1-AS   | AGATGTGTTGGTTCTGTCTCAA<br>CCGGAATACATTGACAAACCAAG   | 197                         |
| CgERG2-S<br>CgERG2-AS   | TCCCAGGTATGACCCATCATC<br>TGCGAAGGAGTTTTGATCCAT      | 204                         |
| CgERG3-S<br>CgERG3-AS   | TGCACTGGCCTCGTGTCTAC<br>TAACCGTCTGACTGGGTGGAA       | 188                         |
| CgERG4-S<br>CgERG4-AS   | CCCTCAATTAGGTGTCGTCATGT<br>GGCACGATTAATTCTTCACCCTTA | 162                         |
| CgERG10-S<br>CgERG10-AS | GCCAGAACCCCAATTGGTT<br>TGCAATGACACCTAGGTCAACAG      | 195                         |
| CgERG11-S<br>CgERG11-AS | TGTCTTGATGGGTGGTCAACA<br>CTGGTCTTTCAGCCAAATGCA      | 184                         |
| CgAUS1-S<br>CgAUS1-AS   | TGGCTAACTTGTTTCGCTGGT<br>AGCGTACATTGCAGGGTTCA       | 125                         |
| CgKRE1-S<br>CgKRE1-AS   | CGAAGGCTACGACTACAAACA<br>CGGCATCAGTGACAACAGTA       | 102                         |
| CgFKS1-S<br>CgFKS1-AS   | CGGTGATACAGCCAACTACAA<br>CTCCTCCATGGCCTTCTTATTC     | 145                         |

**Table S2:** Percentage reduction in metabolic activity of *C. glabrata* biofilm cells relative to control cells developed on the surface of urinary catheter and contact eye lens.

| QQM ( $\mu\text{g ml}^{-1}$ ) | CG (% reduction in biofilm) |                | CCG 3 (% reduction in biofilm) |                |
|-------------------------------|-----------------------------|----------------|--------------------------------|----------------|
|                               | Catheter                    | Eye lens       | Catheter                       | Eye lens       |
| CIN (128)                     | 36.1 $\pm$ 1.3              | 85.8 $\pm$ 1.7 | 76.9 $\pm$ 1.6                 | 84.4 $\pm$ 1.1 |
| CIN (256)                     | 54.8 $\pm$ 3.8              | 86.7 $\pm$ 2.6 | 79.1 $\pm$ 1.5                 | 84.8 $\pm$ 1.8 |
| EUG (256)                     | 14.4 $\pm$ 2.3              | 74.7 $\pm$ 2.7 | 57.1 $\pm$ 1.9                 | 75.9 $\pm$ 1.3 |
| EUG (512)                     | 22.4 $\pm$ 3.5              | 83.7 $\pm$ 2.8 | 64.1 $\pm$ 1.2                 | 79.4 $\pm$ 3.3 |
